# Supplementary material for: Ultrafast photophysics of the environment-sensitive 4′-methoxy-3-hydroxyflavone fluorescent dye
Source: Royal Society of Chemistry journal article supplement (doi:10.1039/c7cp08584b), 2018-01-01
Supplement: c7cp08584b1.pdf [file c7cp08584b1.pdf]

## Supporting information for

### Ultrafast photophysics of the environment-sensitive 4'-methoxy-3-hydroxyflavone fluorescent dye

Anastasia Ioanna Skilitsi<sup>1</sup>, Damianos Agathangelou<sup>1</sup>, Ievgen Shulov,<sup>2</sup> Jamie Conyard<sup>1</sup>, Stefan Haacke<sup>1</sup>, Yves Mély<sup>2</sup>, Andrey Klymchenko,<sup>2</sup> Jérémie Léonard<sup>1</sup>

1. Institut de Physique et Chimie des Matériaux de Strasbourg, & Labex NIE CNRS Université de Strasbourg, Strasbourg, France

2. Laboratoire de Biophotonique et Pharmacologie, CNRS - Université de Strasbourg, Illkirch, France

[Jeremie.Leonard@ipcms.unistra.fr](mailto:Jeremie.Leonard@ipcms.unistra.fr)

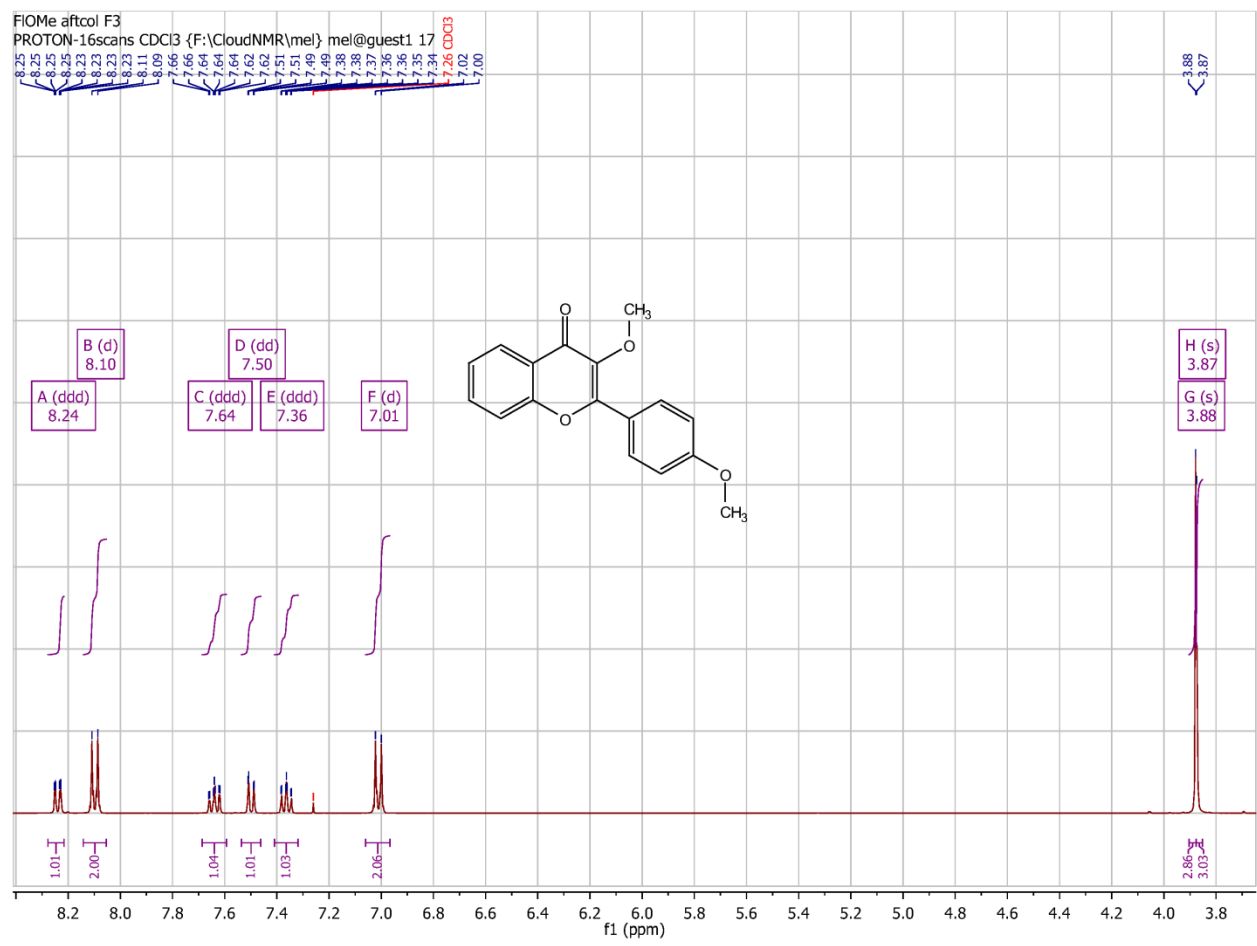

Figure S1. <sup>1</sup>H NMR spectrum of 4'-methoxy-3-methoxyflavone.

## Qualitative Analysis Report

|                               |                   |                      |                        |
|-------------------------------|-------------------|----------------------|------------------------|
| <b>Data Filename</b>          | QT11566.d         | <b>Sample Name</b>   | FIOMe                  |
| <b>Inj. Vol.</b>              | 0.1               | <b>Position</b>      | P1-D1                  |
| <b>Instrument Name</b>        | SCA Illkirch QToF | <b>User Name</b>     | PW                     |
| <b>Acq Method</b>             | C18-2,1x5x1,8,m   | <b>Acquired Time</b> | 12/18/2015 10:04:46 AM |
| <b>IRM Calibration Status</b> | Success           | <b>DA Method</b>     | C18-2,1x5x1,8,m        |

Sample Group      Info.

### User Chromatograms

Fragmentor Voltage 120    Collision Energy 0    Ionization Mode ESI

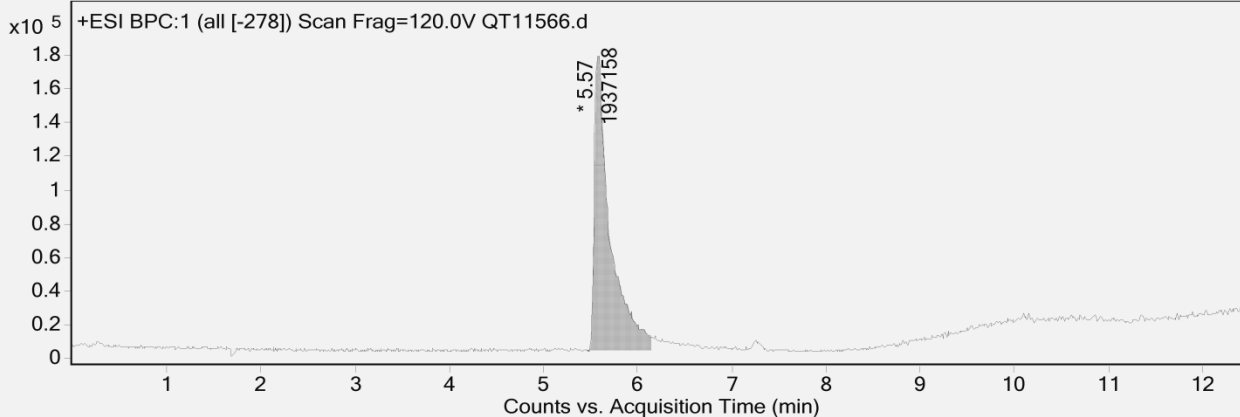

#### Integration Peak List

| Start | RT   | End  | Height | Area    | Area % | AreaSum% |
|-------|------|------|--------|---------|--------|----------|
| 5.46  | 5.57 | 6.14 | 174884 | 1937158 | 100    | 100      |

## Qualitative Analysis Report

Spectrum Source      Fragmentor Voltage      Collision Energy      Ionization Mode  
 Peak (1) in "+ BPC:1 (all [-278]) Scan"      120      0      ESI

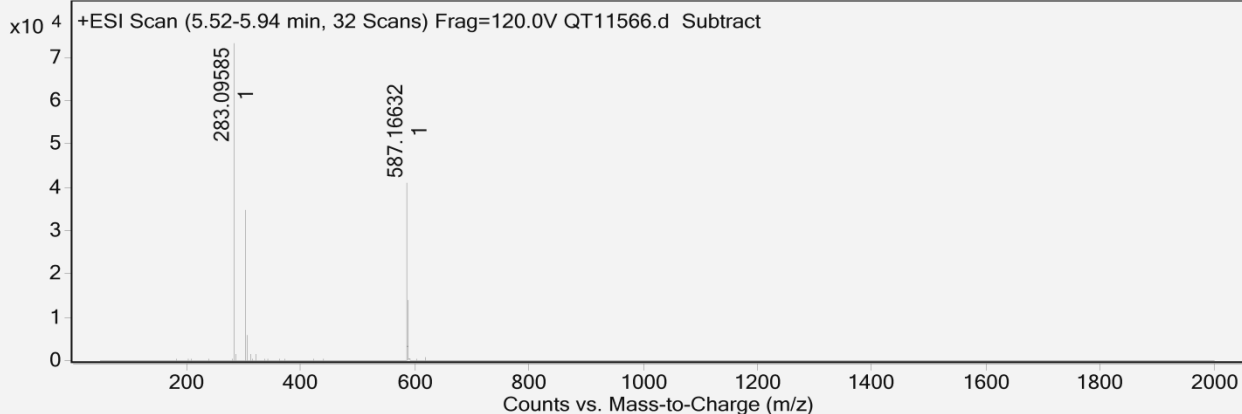

#### Peak List

| m/z       | z | Abund   | Formula       | Ion     |
|-----------|---|---------|---------------|---------|
| 283.09585 | 1 | 76010.9 | C17 H15 O4    | (M+H)+  |
| 284.0991  | 1 | 12248.2 | C17 H15 O4    | (M+H)+  |
| 305.0776  | 1 | 34644.8 |               |         |
| 306.0808  | 1 | 5931.1  |               |         |
| 587.16632 | 1 | 41628.9 | C34 H28 Na O8 | (M+Na)+ |
| 588.16941 | 1 | 14080   | C34 H28 Na O8 | (M+Na)+ |

#### Formula Calculator Results

| Formula    | Best | Mass      | Tgt Mass  | Diff (ppm) | Mz        | Ion Species   | Score |
|------------|------|-----------|-----------|------------|-----------|---------------|-------|
| C17 H14 O4 | TRUE | 282.08857 | 282.08921 | 2.25       | 283.09585 | C17 H15 O4    | 98.41 |
| C34 H28 O8 | TRUE | 564.17709 | 564.17842 | 2.36       | 587.16632 | C34 H28 Na O8 | 97.13 |

Figure S2. LCMS data of 4'-methoxy-3-methoxyflavone.

**Supplementary Note 1: Relation between the ratio of the total N\* and T\* fluorescence intensities and the parameters of the rate equation model.**

Within the model introduced in Figure 9, the time evolution of the excited state populations  $N^*(t)$  and  $T^*(t)$  can be written:

$$\begin{aligned}\frac{dN^*}{dt}(t) &= -\frac{N^*(t)}{\tau_N} + k_- T^*(t) \\ \frac{dT^*}{dt}(t) &= k_+ N^*(t) - \frac{T^*(t)}{\tau_T}\end{aligned}$$

where  $\tau_N$  and  $\tau_T$  are the  $N^*$  and  $T^*$  lifetimes, i.e. the inverse of the sum of all radiative and non-radiative (nr) decay channels:  $\tau_N^{-1} = k_N + k_+ + k_N^{nr}$  and  $\tau_T^{-1} = k_T + k_- + k_T^{nr}$ .

The ratiometric fluorescence detection approach measures the ratio  $R=I_N/I_T$  between the measured fluorescence intensities of the  $N^*$  and  $T^*$  bands. By definition, the intensity of the  $N^*$  band (and similarly for the  $T^*$  band) can be written:

$$I_N = k_N \int_0^\infty N^*(t) dt$$

with  $k_N$  the radiative decay rate. Hence, instead of resolving the set of differential equations (as done e.g. in Shynhar et al., J. Phys. Chem. A, 2003, 107, 9522-9529), we may integrate both equations, which yields:

$$\begin{aligned}N_0 &= \frac{I_N}{\tau_N k_N} - k_- \frac{I_T}{k_T} \\ 0 &= k_+ \frac{I_N}{k_N} - \frac{I_T}{\tau_T k_T}\end{aligned}$$

with  $N_0$ , the population initially promoted to  $N^*$  upon light absorption from  $N$ . The second line directly gives the ratio  $R$  between the total emission intensities in both bands:

$$R = \frac{I_N}{I_T} = \frac{k_N}{k_T} \frac{1}{\tau_T k_+}$$

Using in addition the first line allows us to conclude:

$$I_N = \frac{N_0 k_N \tau_N}{1 - k_+ k_- \tau_N \tau_T} \quad (\text{Eq. 1})$$

$$I_T = \frac{N_0 k_+ k_T \tau_N \tau_T}{1 - k_+ k_- \tau_N \tau_T} \quad (\text{Eq. 2})$$

**Supplementary Note 2: Case study about the ratiometric detection of two sub-populations  $a$  and  $b$  characterized by distinct ESIPT rates**

As described in the main text we may introduce:

$$R = \frac{I_{Na} + I_{Nb}}{I_{Ta} + I_{Tb}}$$

In the simplistic case of two subpopulations differing only by their ESIPT rates  $k_+$  (*i. e.*  $k_+^a \neq k_+^b$ ), with both ESIPT reactions occurring irreversibly ( $k_- \sim 0$ ) and rapidly ( $k_+ \tau_N \sim 1$  for each subpopulation), then Eq. 1 and 2 above can be written:

$$I_{Na} \sim \alpha N_0 k_N \tau_{Na} \sim \alpha N_0 k_N / k_+^a, \quad I_{Nb} \sim (1 - \alpha) N_0 k_N \tau_{Nb} \sim (1 - \alpha) N_0 k_N / k_+^b$$

$$I_{Ta} \sim \alpha N_0 k_T \tau_T, \quad I_{Tb} \sim (1 - \alpha) N_0 k_T \tau_T$$

with  $\alpha$  and  $(1 - \alpha)$  the relative proportions of species  $a$  and  $b$ , respectively.

And finally:

$$R \sim \alpha \frac{k_N}{k_T} \frac{1}{\tau_T k_+^a} + (1 - \alpha) \frac{k_N}{k_T} \frac{1}{\tau_T k_+^b}$$
